# Supplementary material for: Genomic Analysis of the Unusual Staphylococcus aureus ST630 Isolates Harboring WTA Glycosyltransferase Genes tarM and tagN
Source: PubMed Central journal article supplement (PMC8849055; doi:10.1128/spectrum.01501-21), 2022-02-16
Supplement: spectrum01501-21_supp_1_seq6.pdf [file spectrum01501-21_supp_1_seq6.pdf]

## SUPPLEMENTAL MATERIAL

**Table S1** List of prophages identified in ST630 *S. aureus* strains

| Strain | Prophage region ID | Length | Completeness | Score | Total Proteins | Region Position        | Most Common Phage                 | GC%    |
|--------|--------------------|--------|--------------|-------|----------------|------------------------|-----------------------------------|--------|
| BJ12   | Prophage 1         | 19.6Kb | incomplete   | 20    | 16             | contig9:31298-50981    | PHAGE_Staphy_StB20_like_NC_028821 | 33.33% |
|        | Prophage 2         | 15.4Kb | questionable | 75    | 21             | contig20:33929-49348   | PHAGE_Staphy_PT1028_NC_007045     | 31.74% |
| BJ95   | Prophage 1         | 6.4Kb  | incomplete   | 60    | 10             | contig8:45120-51547    | PHAGE_Strept_Jay2Jay_NC_029098    | 28.59% |
|        | Prophage 2         | 22kb   | incomplete   | 20    | 26             | contig16:56-22019      | PHAGE_Staphy_187_NC_007047        | 32.64% |
| HN288  | Prophage 1         | 6.4Kb  | questionable | 70    | 9              | contig12:13138-19571   | PHAGE_Strept_Jay2Jay_NC_029098    | 28.57% |
|        | Prophage 2         | 14.8Kb | incomplete   | 10    | 21             | contig12:132814-147637 | PHAGE_Staphy_PT1028_NC_007045     | 31.50% |
|        | Prophage 3         | 35.6Kb | incomplete   | 40    | 58             | contig41:1-35610       | PHAGE_Staphy_187_NC_007047        | 34.64% |
|        | Prophage 4         | 12.9Kb | incomplete   | 20    | 15             | contig49:1620-14542    | PHAGE_Staphy_PT1028_NC_007045     | 32.63% |
|        | Prophage 1         | 42.9Kb | incomplete   | 50    | 64             | contig38:64-43036      | PHAGE_Staphy_phiN315_NC_004740    | 33.07% |
| NXNE   | Prophage 2         | 27.5Kb | incomplete   | 60    | 28             | contig47:272-27840     | PHAGE_Staphy_phinm2_NC_028913     | 34.34% |
|        | Prophage 3         | 22Kb   | incomplete   | 10    | 26             | contig52:141-22147     | PHAGE_Staphy_187_NC_007047        | 34.94% |
|        | Prophage 4         | 6.4Kb  | questionable | 70    | 9              | contig86:663-7114      | PHAGE_Strept_Jay2Jay_NC_029098    | 28.58% |
|        | Prophage 5         | 11Kb   | incomplete   | 20    | 31             | contig104:1-11036      | PHAGE_Staphy_96_NC_007057         | 34.26% |
|        | Prophage 6         | 8.6Kb  | incomplete   | 10    | 21             | contig119:1-8652       | PHAGE_Staphy_77_NC_005356         | 35.10% |
| NX98   | Prophage 1         | 6.4Kb  | incomplete   | 60    | 9              | contig6:77239-83667    | PHAGE_Strept_Jay2Jay_NC_029098    | 28.60% |
|        | Prophage 2         | 30.5Kb | incomplete   | 40    | 25             | contig8:70678-101202   | PHAGE_Staphy_PT1028_NC_007045     | 32.87% |
|        | Prophage 3         | 39.3Kb | questionable | 90    | 65             | contig22:66-39379      | PHAGE_Staphy_187_NC_007047        | 34.33% |
|        | Prophage 1         | 15.4Kb | questionable | 88    | 22             | 858247-873665          | PHAGE_Staphy_PT1028_NC_007045     | 31.73% |
| WH39   | Prophage 2         | 7.9Kb  | questionable | 70    | 14             | 1577666-1585626        | PHAGE_Bacter_Diva_NC_028788       | 27.30% |
|        | Prophage 3         | 40.5Kb | incomplete   | 50    | 62             | 2262657-2303229        | PHAGE_Staphy_187_NC_007047        | 34.47% |
|        | Prophage 4         | 25.9Kb | intact       | 95    | 30             | 2518589-2544532        | PHAGE_Staphy_PT1028_NC_007045     | 30.84% |
|        | Prophage 5         | 6.4Kb  | incomplete   | 50    | 7              | 2659030-2665474        | PHAGE_Strept_Jay2Jay_NC_029098    | 28.58% |

|       |            |        |              |     |    |                       |                                    |        |
|-------|------------|--------|--------------|-----|----|-----------------------|------------------------------------|--------|
| WH52  | Prophage 1 | 46.4Kb | questionable | 90  | 37 | 157565-204031         | PHAGE_Staphy_SPbeta_like_NC_029119 | 30.29% |
|       | Prophage 2 | 15.4Kb | questionable | 75  | 21 | 824887-840306         | PHAGE_Staphy_PT1028_NC_007045      | 31.72% |
|       | Prophage 3 | 7Kb    | incomplete   | 30  | 18 | 1544234-1551255       | PHAGE_Strept_9871_NC_031069        | 26.06% |
|       | Prophage 4 | 43.9Kb | intact       | 100 | 64 | 2228780-2272682       | PHAGE_Staphy_53_NC_007049.1        | 34.26% |
|       | Prophage 5 | 34.6Kb | questionable | 88  | 28 | 2492095-2526707       | PHAGE_Staphy_PT1028_NC_007045      | 32.12% |
| WH60  | Prophage 1 | 6.4Kb  | questionable | 70  | 9  | contig16:11529-17962  | PHAGE_Strept_Jay2Jay_NC_029098     | 28.58% |
|       | Prophage 2 | 15.4Kb | questionable | 75  | 21 | contig20:33936-49354  | PHAGE_Staphy_PT1028_NC_007045      | 31.73% |
|       | Prophage 3 | 19.6Kb | incomplete   | 20  | 16 | contig5:60032-79678   | PHAGE_Staphy_StB20_like_NC_028821  | 33.32% |
|       | Prophage 4 | 22Kb   | incomplete   | 35  | 25 | contig4::21560-43678  | PHAGE_Staphy_187_NC_007047         | 34.26% |
| WH99  | Prophage 1 | 40.3Kb | intact       | 100 | 66 | contig3:80112-120415  | PHAGE_Staphy_187_NC_007047         | 34.42% |
|       | Prophage 2 | 6.4Kb  | incomplete   | 60  | 9  | contig7:77316-83749   | PHAGE_Strept_Annadreamy_NC_048719  | 28.58% |
|       | Prophage 3 | 15.4Kb | questionable | 75  | 22 | contig20:4371-19789   | PHAGE_Staphy_PT1028_NC_007045      | 31.71% |
|       | Prophage 4 | 19.6Kb | incomplete   | 20  | 16 | contig5:59976-79659   | PHAGE_Staphy_StB20_like_NC_028821  | 33.33% |
| WH114 | Prophage 1 | 40.7Kb | questionable | 90  | 65 | contig1:88751-129503  | PHAGE_Staphy_187_NC_007047         | 34.49% |
|       | Prophage 2 | 13.5Kb | incomplete   | 20  | 16 | contig1:325996-339512 | PHAGE_Staphy_PT1028_NC_007045      | 33.22% |
|       | Prophage 3 | 6.4Kb  | incomplete   | 60  | 9  | contig6:45196-51629   | PHAGE_Prochl_P_SSM2_NC_006883      | 28.60% |
|       | Prophage 4 | 13.6Kb | incomplete   | 20  | 16 | contig29:1620-15226   | PHAGE_Staphy_PT1028_NC_007045      | 32.40% |
| WH119 | Prophage 1 | 40.5Kb | intact       | 100 | 67 | contig4:80110-120695  | PHAGE_Staphy_187_NC_007047         | 34.56% |
|       | Prophage 2 | 6.4Kb  | incomplete   | 60  | 9  | contig6:77376-83809   | PHAGE_Synech_ACG_2014f_NC_047714   | 28.58% |
|       | Prophage 3 | 13.5Kb | incomplete   | 20  | 16 | contig11:140-13656    | PHAGE_Staphy_PT1028_NC_007045      | 33.23% |
|       | Prophage 4 | 27.5Kb | incomplete   | 20  | 21 | contig15:54354-81904  | PHAGE_Staphy_PT1028_NC_007045      | 32.95% |
| WH211 | Prophage 1 | 29.6Kb | incomplete   | 60  | 51 | contig37:558-30191    | PHAGE_Staphy_187_NC_007047         | 35.28% |
|       | Prophage 2 | 15Kb   | incomplete   | 20  | 22 | contig55:4022-19099   | PHAGE_Staphy_PT1028_NC_007045      | 31.39% |
|       | Prophage 1 | 39.7Kb | incomplete   | 50  | 64 | contig1:85296-125021  | PHAGE_Staphy_187_NC_007047         | 34.42% |
| WH299 | Prophage 2 | 6.4Kb  | questionable | 70  | 9  | contig7:77374-83807   | PHAGE_Strept_Jay2Jay_NC_02909      | 28.58% |
|       | Prophage 3 | 19Kb   | incomplete   | 20  | 11 | contig12:58623-77625  | PHAGE_Staphy_PT1028_NC_007045      | 33.44% |

|        |            |        |              |     |    |                    |                                   |        |
|--------|------------|--------|--------------|-----|----|--------------------|-----------------------------------|--------|
|        | Prophage 4 | 4.8Kb  | incomplete   | 20  | 8  | contig35:1022-5877 | PHAGE_Staphy_PT1028_NC_007045     | 32.43% |
|        | Prophage 1 | 15.4Kb | questionable | 88  | 22 | 812549-827967      | PHAGE_Staphy_PT1028_NC_007045     | 31.73% |
|        | Prophage 2 | 28.5Kb | intact       | 110 | 28 | 964920-993502      | PHAGE_Escher_RCS47_NC_042128      | 29.68% |
|        | Prophage 3 | 8.8Kb  | questionable | 70  | 15 | 1527910-1536768    | PHAGE_Bacter_Sitara_NC_028854     | 27.17% |
| RJ1267 | Prophage 4 | 47.8Kb | intact       | 100 | 72 | 1973119-2020948    | PHAGE_Staphy_P282_NC_048634       | 33.30% |
|        | Prophage 5 | 22Kb   | incomplete   | 20  | 24 | 2053456-2075462    | PHAGE_Staphy_PT1028_NC_007045     | 31.61% |
|        | Prophage 6 | 40.3Kb | intact       | 100 | 65 | 2274051-2314415    | PHAGE_Staphy_187_NC_007047        | 34.45% |
|        | Prophage 7 | 16.6Kb | intact       | 95  | 23 | 2540250-2556923    | PHAGE_Staphy_PT1028_NC_007045     | 30.95% |
|        | Prophage 8 | 6.4Kb  | incomplete   | 40  | 7  | 2676385-2682829    | PHAGE_Escher_500465_1_NC_049342   | 28.58% |
|        | Prophage 1 | 15.4Kb | questionable | 88  | 23 | 828388-843806      | PHAGE_Staphy_PT1028_NC_007045     | 31.73% |
|        | Prophage 2 | 7.9Kb  | questionable | 70  | 14 | 1317600-1325560    | PHAGE_Paenib_Xenia_NC_028837      | 27.30% |
|        | Prophage 3 | 29.7Kb | questionable | 80  | 17 | 1866518-1896262    | PHAGE_Escher_RCS47_NC_042128      | 29.91% |
| 128254 | Prophage 4 | 6.6Kb  | incomplete   | 40  | 7  | 2019540-2026154    | PHAGE_Staphy_phi7401PVL_NC_020199 | 30.99% |
|        | Prophage 5 | 30.5Kb | incomplete   | 30  | 24 | 2022220-2052722    | PHAGE_Staphy_PT1028_NC_007045     | 30.93% |
|        | Prophage 6 | 40.5Kb | intact       | 100 | 65 | 2251193-2291728    | PHAGE_Staphy_187_NC_007047        | 34.36% |
|        | Prophage 7 | 16.6Kb | questionable | 88  | 22 | 2519405-2536078    | PHAGE_Staphy_PT1028_NC_007045     | 30.95% |
|        | Prophage 8 | 6.4Kb  | incomplete   | 50  | 8  | 2655501-2661927    | PHAGE_Strept_Jay2Jay_NC_029098    | 28.58% |
|        | Prophage 1 | 15.4Kb | questionable | 88  | 22 | 858072-873490      | PHAGE_Staphy_PT1028_NC_007045     | 31.73% |
|        | Prophage 2 | 28.5Kb | intact       | 100 | 28 | 1010440-1039022    | PHAGE_Escher_RCS47_NC_042128      | 29.67% |
|        | Prophage 3 | 7.9Kb  | questionable | 70  | 14 | 1573275-1581235    | PHAGE_Staphy_187_NC_007047        | 27.30% |
| 110900 | Prophage 4 | 47.8Kb | incomplete   | 60  | 68 | 2016647-2064514    | PHAGE_Staphy_P282_NC_048634       | 33.22% |
|        | Prophage 5 | 22Kb   | incomplete   | 20  | 24 | 2097022-2119029    | PHAGE_Staphy_PT1028_NC_007045     | 31.61% |
|        | Prophage 6 | 16.6Kb | intact       | 95  | 23 | 2544405-2561078    | PHAGE_Staphy_PT1028_NC_007045     | 30.95% |
|        | Prophage 7 | 6.4Kb  | incomplete   | 40  | 7  | 2680540-2686984    | PHAGE_Strept_Comrade_NC_048728    | 28.58% |

Region Length: The length of the sequence of that region (in bp).



|       |                              |     |      |     |   |   |   |   |      |   |   |   |   |   |   |   |   |   |   |   |   |   |   |
|-------|------------------------------|-----|------|-----|---|---|---|---|------|---|---|---|---|---|---|---|---|---|---|---|---|---|---|
| WH17  | wound secretion              | 398 | t034 | 398 | - | + | - | - | MSSA | S | S | S | S | R | S | S | R | R | S | S | S | S | S |
| WH31  | bronchoalveolar lavage fluid | 8   | t030 | 239 | - | + | + | - | MRSA | R | R | R | R | R | R | S | S | S | S | R | R | S | S |
| WH231 | wound secretion              | 5   | t002 | 5   | + | + | - | - | MSSA | S | S | S | S | R | S | S | S | S | S | S | S | S | S |

R-resistant, I-intermediate, S-susceptible

BJ, Beijing Tsinghua Changgung Hospital

HN, Hainan General Hospital

NX, General Hospital Of Ningxia Medical University

WH, Zhongnan Hospital Of Wuhan University

**Table S3** List of the ST630, CC395, and other epidemic *S. aureus* clones used in this study

| Strain   | Sequence type | Clonal complex | Country     | Accession number |
|----------|---------------|----------------|-------------|------------------|
| JS395    | ST1093        | CC395          | Switzerland | NZ_CP012756      |
| RJ1267   | ST630         | CC8            | China       | NZ_CP047321      |
| PS187    | ST395         | CC395          | Germany     | ARPA00000000     |
| PM1      | ST59          | CC59           | Japan       | NZ_BAFA00000000  |
| Mu50     | ST5           | CC5            | Japan       | NC_002758        |
| N315     | ST5           | CC5            | N315        | BA000018         |
| NCTC8325 | ST8           | CC8            | England     | LS483365         |
| MW2      | ST1           | CC1            | Japan       | NC_003923        |
| MRSA252  | ST1           | CC1            | England     | NC_002952        |
| COL      | ST250         | CC8            | America     | NC_002951        |
| FPR3757  | ST8           | CC8            | America     | NC_007793        |
| 110900   | ST630         | CC8            | Denmark     | CP058615         |
| 128254   | ST630         | CC8            | Denmark     | CP058613         |

|              |        |       |         |              |
|--------------|--------|-------|---------|--------------|
| H-EMRSA-15   | ST22   | CC22  | Belgium | NZ_CP007659  |
| HO 5096 0412 | ST22   | CC22  | England | HE681097     |
| CUHK_HK188   | ST188  | CC1   | China   | JFFV00000000 |
| RGB-095930   | ST6610 | CC8   | Germany | CP077098     |
| 323          | ST426  | CC395 | Germany | CP077906     |
| 324          | ST426  | CC395 | Germany | CP077899     |
| 329          | ST426  | CC395 | Germany | CP077894     |
| NCTC6131     | ST395  | CC395 | England | LR134268     |

**Table S4** Primers used in the present study

| <b>Primer</b>         | <b>sequence (5' –3')</b>                                   | <b>Application</b>          |
|-----------------------|------------------------------------------------------------|-----------------------------|
| <i>tagN</i> -pkor1-B1 | <i>ggggacaagttgtacaaaaagcaggct</i> TGGAGACTGTTGAAAAGCCG    | tagN deletion in WH39       |
| <i>tagN</i> -pkor1-B2 | <i>agtgtcttgattgtacgtca</i> TTGCATAAGGGCTATCCGTG           | tagN deletion in WH39       |
| <i>tagN</i> -pkor1-B3 | <i>gacgtacaaatcaagacact</i> GGTGGGTAAACGGTAAAAGGC          | tagN deletion in WH39       |
| <i>tagN</i> -pkor1-B4 | <i>ggggaccactttgtacaagaaagctgggt</i> AGGCTATTTGGGTTTCACTCG | tagN deletion in WH39       |
| <i>c-tagN</i> -F      | ACCGAAAGCTTTGCTGGATCCATGAAAAAATTCGAAAAGTAATTAAGAA          | <i>tagN</i> complementation |
| <i>c-tagN</i> -R      | TGGTGATGAGAACCTCTCGAGCCAATAAATTATAAAAATTCAGACATAGCTTTC     | <i>tagN</i> complementation |











**Figure S2** Gene sequence alignment of (a) *tagV* with its close homologue identified in *S.pseudintermedius* ED99 (69.11% identity) and *S. epidermidis* B1200343 (69.11% identity); (b) *tagN* with its close homologue identified in *S. carnosus* TM300 (68.77% identity), *S. lugdunensis* NCTC12217 (65.25% identity), *S. hominis* K1 (65.01% identity), and *S. warnei* NCTC7291 (64.67% identity); (c) *tagD* with its close homologue identified in *S. haemolyticus* FDAARGOS\_517(80.56% identity) and *S. condimenti* NCTC13827 (80.98% identity); and (d) *tagF* with its close homologue identified in *S. simiae* NCTC13838 (72.12% identity). The homology searches and alignments were performed using blastp and ClustalW. Sequence identity (\*), strong similarity (:), weak similarity (.) and difference ( ) are indicated.

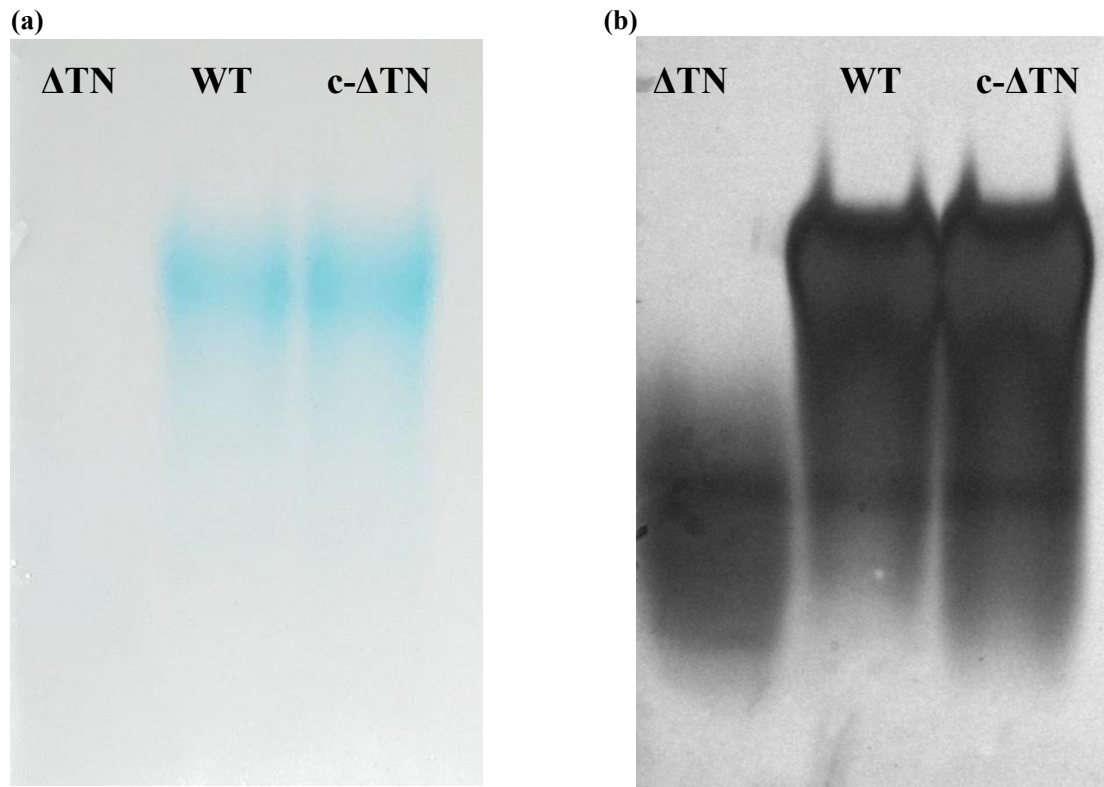

**Figure S3** Native PAGE analysis of WTA preparations of *tagN* mutant ( $\Delta TN$ ) and its complementation (c- $\Delta TN$ ) in WH39. Samples were resolved in polyacrylamide gels and visualized with alcian blue (a) /silver (b) staining.
